# Supplementary material for: Partial Purification and Characterization of Bioactive Peptides from Cooked New Zealand Green-Lipped Mussel (Perna canaliculus) Protein Hydrolyzates
Source: PubMed Central journal article supplement (PMC7404561; doi:10.3390/foods9070879), 2020-07-04
Supplement: foods-09-00879-s001.pdf [file foods-09-00879-s001.pdf]

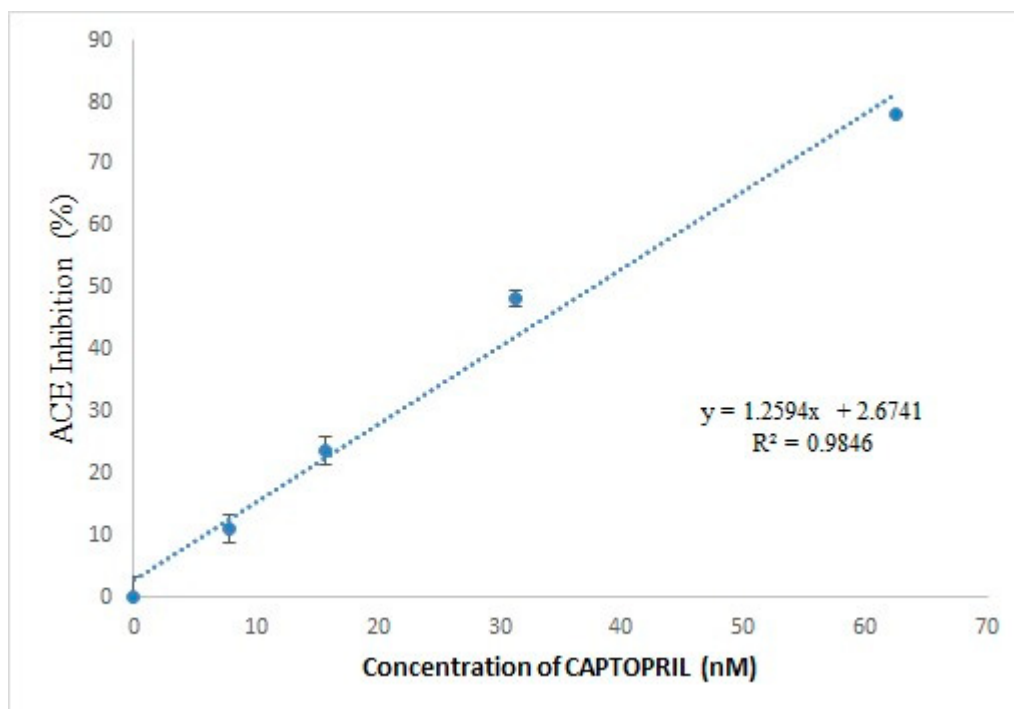

Figure S1. Standard curve of ACE inhibition using Captopril.
